# Supplementary material for: COVID-19 vaccine immunogenicity among chronic liver disease patients and liver transplant recipients: A meta-analysis
Source: PubMed Central journal article supplement — Clin Mol Hepatol. 2022 Jun 3;28(4):890–911. doi: 10.3350/cmh.2022.0087 (PMC9597217; doi:10.3350/cmh.2022.0087), 2022-06-03
Supplement: cmh-2022-0087-suppl3.pdf [file cmh-2022-0087-suppl3.pdf]

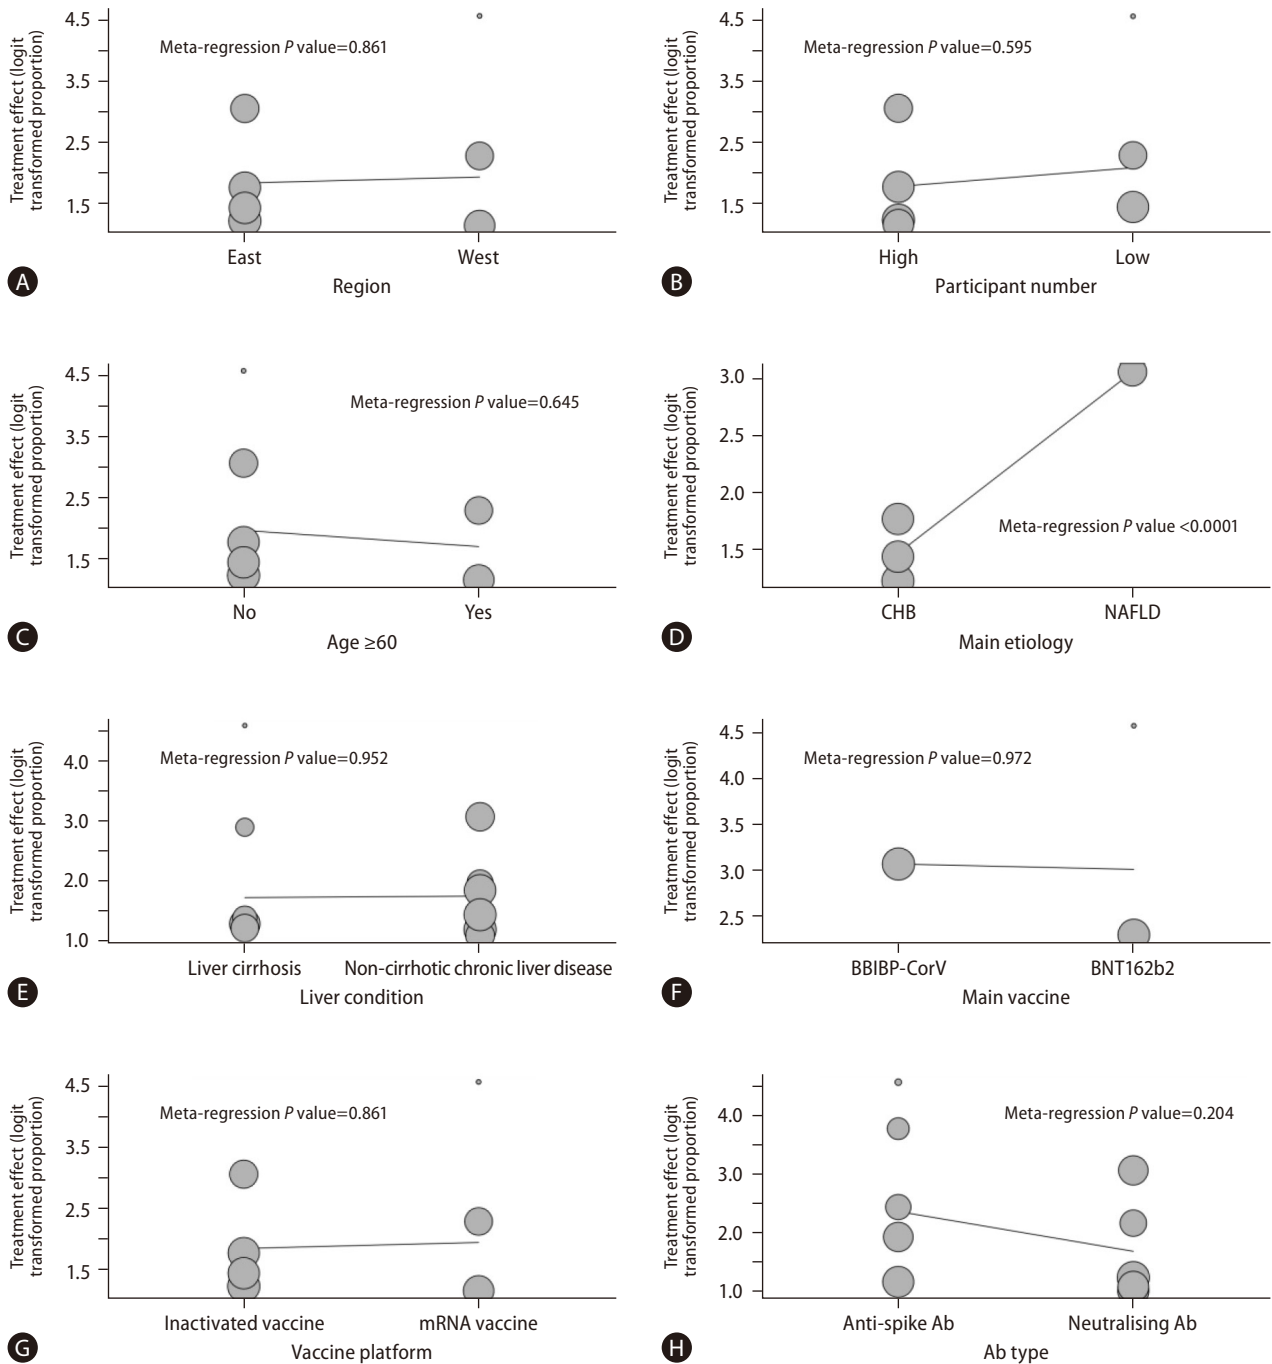

**Supplementary Figure 3.** Meta-regression analysis for seropositivity in chronic liver disease. Bubble plot with fixed meta-regression line of (A) region, (B) participant number, (C) age  $\geq 60$ , (D) etiology of liver disease, (E) cirrhosis status, (F) vaccine type, (G) vaccine platform, (H) antibody type, (I) time interval of antibody measurement from second dose of vaccination ( $\geq 30$  days), (J) method of antibody test (ECLIA vs. ELISA), (K) method of antibody test (CLIA vs. ECLIA), (L) method of antibody test (CLIA vs. ELISA). The size of circles is proportional to weight of each study in fitted random effects meta-regression. ECLIA, electrochemiluminescence immunoassay analyzer; ELISA, enzyme-linked immunosorbent assay; CLIA, chemiluminescence immunoassays.

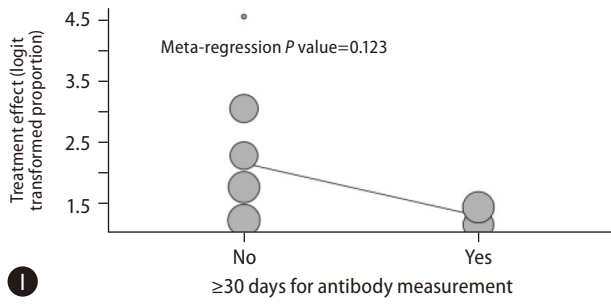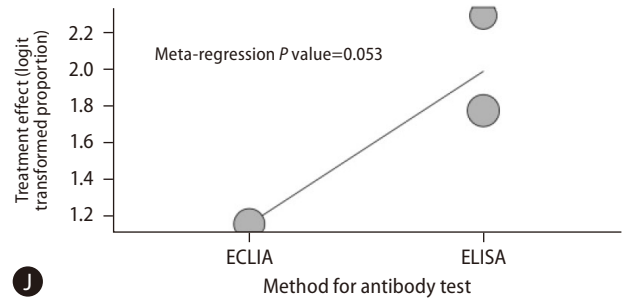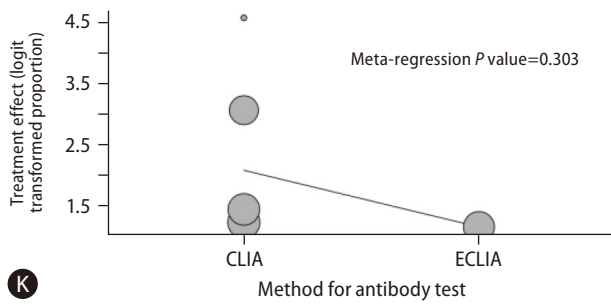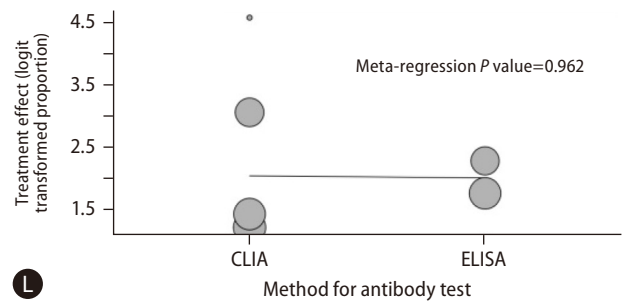

Supplementary Figure 3. Continued.
