# Supplementary material for: COVID-19 vaccine immunogenicity among chronic liver disease patients and liver transplant recipients: A meta-analysis
Source: PubMed Central journal article supplement — Clin Mol Hepatol. 2022 Jun 3;28(4):890–911. doi: 10.3350/cmh.2022.0087 (PMC9597217; doi:10.3350/cmh.2022.0087), 2022-06-03
Supplement: cmh-2022-0087-suppl17.pdf [file cmh-2022-0087-suppl17.pdf]

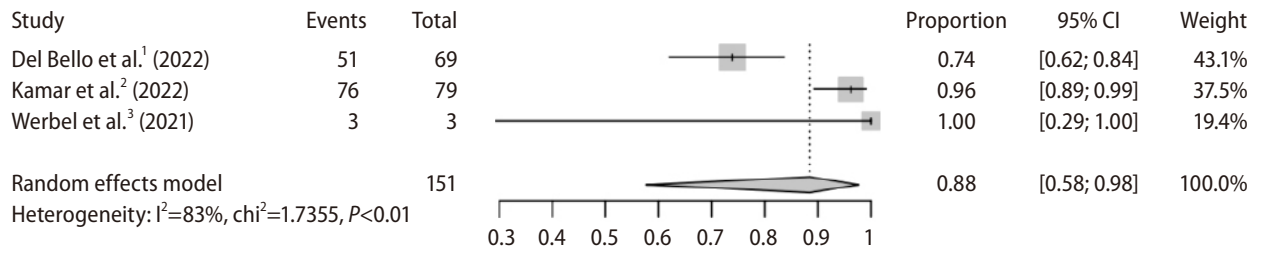

**Supplementary Figure 17.** Pooled seroconversion rate in liver transplant recipients with third dose of vaccine. CI, confidence interval.
