# Supplementary material for: COVID-19 vaccine immunogenicity among chronic liver disease patients and liver transplant recipients: A meta-analysis
Source: PubMed Central journal article supplement — Clin Mol Hepatol. 2022 Jun 3;28(4):890–911. doi: 10.3350/cmh.2022.0087 (PMC9597217; doi:10.3350/cmh.2022.0087), 2022-06-03
Supplement: cmh-2022-0087-suppl18.pdf [file cmh-2022-0087-suppl18.pdf]

**Supplementary Table 1.** Quality assessment according to Newcastle-Ottawa quality assessment scale

| Study                                 | Selection                            |                                 |                           | Comparability                                                       |                            | Exposure/outcome               |                       |                                             |                                 |       |
|---------------------------------------|--------------------------------------|---------------------------------|---------------------------|---------------------------------------------------------------------|----------------------------|--------------------------------|-----------------------|---------------------------------------------|---------------------------------|-------|
|                                       | Representativeness of exposed cohort | Selection of non-exposed cohort | Ascertainment of exposure | Demonstration that outcome of interest was not present at the start | Controls for age or gender | Controls for additional factor | Assessment of outcome | Follow-up long enough for outcomes to occur | Adequacy of follow-up of cohort | total |
| <b>Chronic liver disease</b>          |                                      |                                 |                           |                                                                     |                            |                                |                       |                                             |                                 |       |
| Ai et al. <sup>4</sup>                | 1                                    | 0                               | 1                         | 1                                                                   | 1                          | 1                              | 1                     | 1                                           | 1                               | 8     |
| Bakasis et al. <sup>5</sup>           | 1                                    | 1                               | 1                         | 1                                                                   | 1                          | 1                              | 1                     | 1                                           | 1                               | 9     |
| He et al. <sup>6</sup>                | 1                                    | 1                               | 1                         | 1                                                                   | 1                          | 1                              | 1                     | 1                                           | 1                               | 9     |
| Ruether et al. <sup>7</sup>           | 1                                    | 1                               | 1                         | 1                                                                   | 1                          | 1                              | 1                     | 1                                           | 1                               | 9     |
| Thuluvath et al. <sup>8</sup>         | 1                                    | 0                               | 1                         | 1                                                                   | 0                          | 0                              | 1                     | 1                                           | 1                               | 6     |
| Wang et al. <sup>9</sup>              | 1                                    | 0                               | 1                         | 1                                                                   | 0                          | 0                              | 1                     | 1                                           | 1                               | 6     |
| Xiang et al. <sup>10</sup>            | 1                                    | 0                               | 1                         | 1                                                                   | 0                          | 0                              | 1                     | 1                                           | 1                               | 6     |
| <b>Liver transplant (2 doses)</b>     |                                      |                                 |                           |                                                                     |                            |                                |                       |                                             |                                 |       |
| Rashidi-Alavijeh et al. <sup>11</sup> | 1                                    | 1                               | 1                         | 1                                                                   | 1                          | 1                              | 1                     | 1                                           | 1                               | 9     |
| Boyarsky et al. <sup>12</sup>         | 1                                    | 0                               | 1                         | 1                                                                   | 0                          | 0                              | 1                     | 1                                           | 1                               | 6     |
| Cholankeril et al. <sup>13</sup>      | 1                                    | 0                               | 1                         | 1                                                                   | 1                          | 1                              | 1                     | 1                                           | 1                               | 8     |
| Davidov et al. <sup>14</sup>          | 1                                    | 0                               | 1                         | 1                                                                   | 1                          | 1                              | 1                     | 1                                           | 1                               | 8     |
| Erol et al. <sup>15</sup>             | 1                                    | 0                               | 1                         | 1                                                                   | 0                          | 0                              | 1                     | 1                                           | 1                               | 6     |
| Fernández-Ruiz et al. <sup>16</sup>   | 1                                    | 0                               | 1                         | 1                                                                   | 0                          | 0                              | 1                     | 1                                           | 1                               | 6     |
| Guarino et al. <sup>17</sup>          | 1                                    | 0                               | 1                         | 1                                                                   | 1                          | 1                              | 1                     | 1                                           | 1                               | 8     |
| Hall et al. <sup>18</sup>             | 1                                    | 0                               | 1                         | 1                                                                   | 0                          | 0                              | 1                     | 1                                           | 1                               | 6     |
| Herrera et al. <sup>19</sup>          | 1                                    | 0                               | 1                         | 1                                                                   | 0                          | 0                              | 1                     | 1                                           | 1                               | 6     |
| Holden et al. <sup>20</sup>           | 1                                    | 0                               | 1                         | 1                                                                   | 0                          | 0                              | 1                     | 1                                           | 1                               | 6     |
| Huang et al. <sup>21</sup>            | 1                                    | 0                               | 1                         | 1                                                                   | 0                          | 0                              | 1                     | 1                                           | 1                               | 6     |
| Marion et al. <sup>22</sup>           | 1                                    | 0                               | 1                         | 1                                                                   | 0                          | 0                              | 1                     | 1                                           | 1                               | 6     |
| Mazzola et al. <sup>23</sup>          | 1                                    | 0                               | 1                         | 1                                                                   | 0                          | 0                              | 1                     | 1                                           | 1                               | 6     |
| Mulder et al. <sup>24</sup>           | 1                                    | 0                               | 1                         | 1                                                                   | 1                          | 1                              | 1                     | 1                                           | 1                               | 8     |
| Nazaruk et al. <sup>25</sup>          | 1                                    | 0                               | 1                         | 1                                                                   | 0                          | 0                              | 1                     | 1                                           | 1                               | 6     |
| Rabinowich et al. <sup>26</sup>       | 1                                    | 0                               | 1                         | 1                                                                   | 1                          | 1                              | 1                     | 1                                           | 1                               | 8     |
| Ruether et al. <sup>7</sup>           | 1                                    | 1                               | 1                         | 1                                                                   | 1                          | 1                              | 1                     | 1                                           | 1                               | 9     |

Supplementary Table 1. Continted

| Study                           | Selection                            |                                 |                           | Comparability                                                       |                            | Exposure/outcome               |                       |                                             |                                 |       |
|---------------------------------|--------------------------------------|---------------------------------|---------------------------|---------------------------------------------------------------------|----------------------------|--------------------------------|-----------------------|---------------------------------------------|---------------------------------|-------|
|                                 | Representativeness of exposed cohort | Selection of non-exposed cohort | Ascertainment of exposure | Demonstration that outcome of interest was not present at the start | Controls for age or gender | Controls for additional factor | Assessment of outcome | Follow-up long enough for outcomes to occur | Adequacy of follow-up of cohort | total |
| Strauss et al. <sup>27</sup>    | 1                                    | 0                               | 1                         | 1                                                                   | 1                          | 1                              | 1                     | 1                                           | 1                               | 8     |
| Thuluvath et al. <sup>8</sup>   | 1                                    | 0                               | 1                         | 1                                                                   | 0                          | 0                              | 1                     | 1                                           | 1                               | 6     |
| Timmermann et al. <sup>28</sup> | 1                                    | 0                               | 1                         | 1                                                                   | 1                          | 1                              | 1                     | 1                                           | 1                               | 8     |
| Liver transplant (3 doses)      |                                      |                                 |                           |                                                                     |                            |                                |                       |                                             |                                 |       |
| Del Bello et al. <sup>1</sup>   | 1                                    | 0                               | 1                         | 1                                                                   | 1                          | 1                              | 1                     | 1                                           | 1                               | 8     |
| Kamar et al. <sup>2</sup>       | 1                                    | 0                               | 1                         | 1                                                                   | 0                          | 0                              | 1                     | 1                                           | 1                               | 6     |
| Werbel et al. <sup>3</sup>      | 1                                    | 0                               | 1                         | 1                                                                   | 0                          | 0                              | 1                     | 1                                           | 1                               | 6     |
